# Supplementary material
Source: PubMed Central journal article supplement (PMC3918420)
Supplement: NIHMS530861-supplement-1.pdf [file NIHMS530861-supplement-1.pdf]

**Table S1. Sequences of primers used for genotyping**

| Detection              | Forward primers             | Reverse primers              |
|------------------------|-----------------------------|------------------------------|
| Recombined U6 promoter | 5'-TCTAGA AACTGGATCCGAC-3'  | 5'-AGGCTTTTCTCCAAGGGATATT-3' |
| U6-ploxPneo-BCCIP      | 5'-TCTAGA AACTGGATCCGAC-3'  | 5'-TCGTATAGCATACATTATACG-3'  |
| GFAP-Cre               | 5'-ACTCCTTCATAAAGCCCTCG-3'  | 5'-ATCACTCGTTGCATCGACCG-3'   |
| p53 LoxP               | 5'-GGTTAAACCCAGCTTGACCA-3'  | 5'-GGAGGCAGAGACAGTTGGAG-3'   |
| p53 Delta-exon 2-7     | 5'-CACAAAAACAGGTTAAACCCA-3' | 5'-GAAGACAGAAAAGGGGAGGG-3'   |

Table S2. Primer information for qPCR

| Gene     | Primer ID (TaqMan gene expression assay, Applied Biosystems) |
|----------|--------------------------------------------------------------|
| BCCIP    | Mm01268809_m1                                                |
| Ptch1    | Mm00436026_m1                                                |
| Smo      | Mm01162710_m1                                                |
| Gli1     | Mm00494654_m1                                                |
| Atoh1    | Mm00476035_s1                                                |
| N-myc    | Mm00476449_m1                                                |
| CyclinD1 | Mm00432359_m1                                                |
| CyclinD2 | Mm00438070_m1                                                |

Table S3. Primers used to amplify and sequence the cDNA of BCCIP, PTEN, and Ptch1 fragments.

| Ptch1 Fragments                | Forward primers                               | Reverse primers                                                  |
|--------------------------------|-----------------------------------------------|------------------------------------------------------------------|
| BCCIP                          | BCCIP-F:<br>5'-GCGCAGGCGCAGTGTGACCGG-3'       | BCCIP-R :<br>5'-ATCTCTCAATGGGTTTCTTG-3'                          |
| PTEN                           | PTEN-F:<br>5'-ATGACAGCCATCATCAAAGA-3'         | PTEN-R:<br>5'-TCAGACTTTTGTAAATTTGTG-3'                           |
| Ptch1-A<br>(exon1-6)           | Ptch1-AF:<br>5'-ATGGCCTCGGCTGGTAACG-3'        | Ptch1-AR:<br>5'-AAGGCCGGTCCATGTACCCATGGC-3'                      |
| Ptch1-B<br>(exon5-10)          | Ptch1-BF:<br>5'-GCTTAATCATTACACCTTTGGACTGC-3' | Ptch1-BR:<br>5'-CTGAGTTGTGCGCAGCATTAAA-3'                        |
| Ptch1-C<br>(exon9-14)          | Ptch1-CF:<br>5'-TCCACTCAAAGGTGCTTCCC-3'       | Ptch1-CR:<br>5'-AAAGGAGCATAGTGCTTCTCTGC-3'                       |
| Ptch1-D<br>(exon14-18)         | Ptch1-DF:<br>5'-TTGAGCCACAGGCCTACACAGAGC-3'   | Ptch1-DR:<br>5'-GTCTGAGGTGTCTCGTAGGCCG-3'                        |
| Ptch1-E<br>(exon15-21)         | Ptch1-EF :<br>5'-TGGGAAACTGGGAGGATCATGC-3'    | Ptch1-ER :<br>5'-GCTCAGGCGAAGGAGTGGGCAGTCG-3'                    |
| Ptch1-F<br>(exon19-23)         | Ptch1-FF :<br>5'-GTGGAGTTCACCGTCCACGTGGC-3'   | Ptch1-FR :<br>5'-<br>GAAGCGGCCGCTCAGTTGGAGCTGCTCCCC<br>CACGGC-3' |
| Other BCCIP sequencing primers | BCCIP-F3:<br>5'-TTGCCCTGCCATGCACCAG-3'        | BCCIP-R3:<br>5'-CAGCTCGGCAGTGTTACGGG-3'                          |
| Other PTEN Sequencing primers  | PTEN-F3:<br>5'-CAAGGCCAACCGATACTTCT-3'        | PTEN-R3:<br>5'-GTACAAGATACTCCTTGTC-3'                            |

Table S4. The fractions of the medulloblastoma that have altered mRNA expression of the SHH pathway components (Results based on q-PCR analysis)

| Gene     | Loss of expression |
|----------|--------------------|
| Ptch1    | 16/24 (67%)        |
|          |                    |
| Gene     | Gain of expression |
| Smo      | 12/12 (100%)       |
| Gli1     | 12/12 (100%)       |
| Atoh1    | 12/12 (100%)       |
| N-myc    | 12/12 (100%)       |
| CyclinD1 | 16/16 (100%)       |
| CyclinD2 | 16/16 (100%)       |
